# Supplementary material
Source: Springer Nature journal article supplement (https://www.springermedizin.de/resource/supplementary/12931_2014_1516_MOESM3_ESM.pdf/9426366)

■ Placebo (n=109) ■ UMEC 125 mcg (n=227) ■ UMEC/VI 125/25 mcg (n=226)

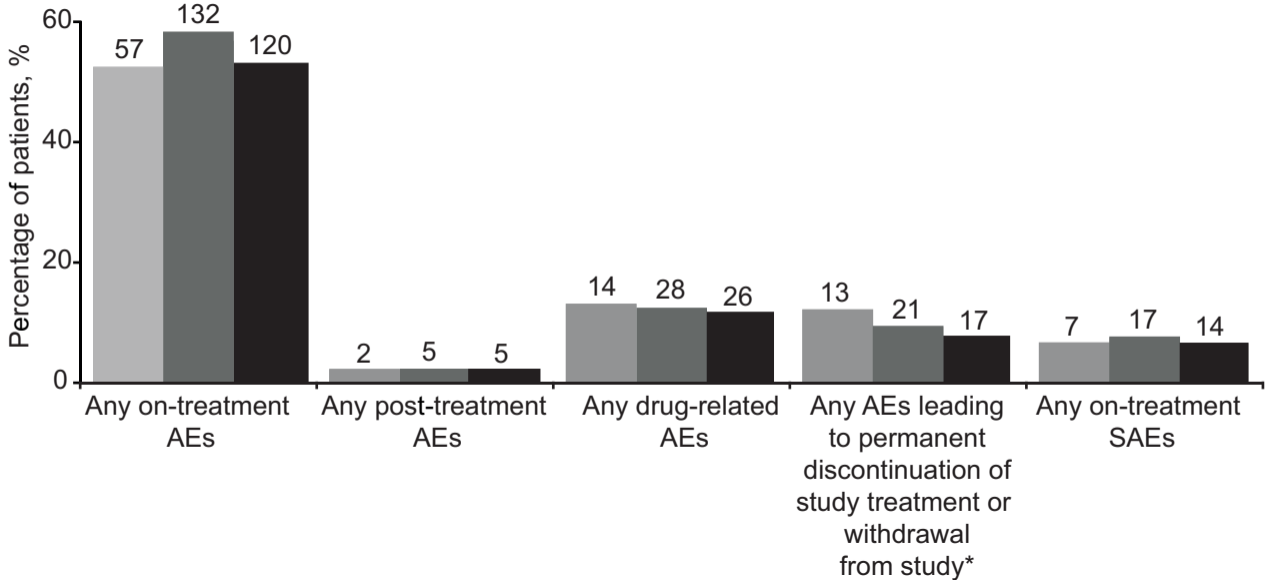

Supplement: MOESM3 [file 9426366]
